# Supplementary material for: Temperature-dependent optical constants of monolayer MoS2, MoSe2, WS2, and WSe2: spectroscopic ellipsometry and first-principles calculations
Source: PubMed Central journal article supplement (PMC7498615; doi:10.1038/s41598-020-71808-y), 2020-09-17
Supplement: 41598_2020_71808_MOESM1_ESM.pdf [file 41598_2020_71808_MOESM1_ESM.pdf]

## Supplementary information

# Temperature-dependent optical constants of monolayer MoS<sub>2</sub>, MoSe<sub>2</sub>, WS<sub>2</sub>, and WSe<sub>2</sub>: Spectroscopic ellipsometry and first-principles calculations

Hsiang-Lin Liu<sup>1,\*</sup>, Teng Yang<sup>2,3,\*</sup>, Jyun-Han Chen<sup>1</sup>, Hsiao-Wen Chen<sup>1</sup>, Huaihong Guo<sup>3,4</sup>,  
Riichiro Saito<sup>3</sup>, Ming-Yang Li<sup>5,6</sup>, and Lain-Jong Li<sup>6</sup>

<sup>1</sup>*Department of Physics, National Taiwan Normal University, Taipei 11677, Taiwan*

<sup>2</sup>*Shenyang National Laboratory for Materials Science, Institute of Metal Research, Chinese Academy  
of Sciences, 72 Wenhua Road, Shenyang 110016, China*

<sup>3</sup>*Department of Physics, Tohoku University, Sendai 980-8578, Japan*

<sup>4</sup>*College of Sciences, Liaoning Shihua University, Fushun, 113001, China*

<sup>5</sup>*Research Center for Applied Science, Academia Sinica, Taipei 10617, Taiwan*

<sup>6</sup>*Physical Science and Engineering Division, King Abdullah University of Science and Technology,  
Thuwal 23955-6900, Kingdom of Saudi Arabia*

\*Corresponding author: [hliu@ntnu.edu.tw](mailto:hliu@ntnu.edu.tw), [yangteng@imr.ac.cn](mailto:yangteng@imr.ac.cn)

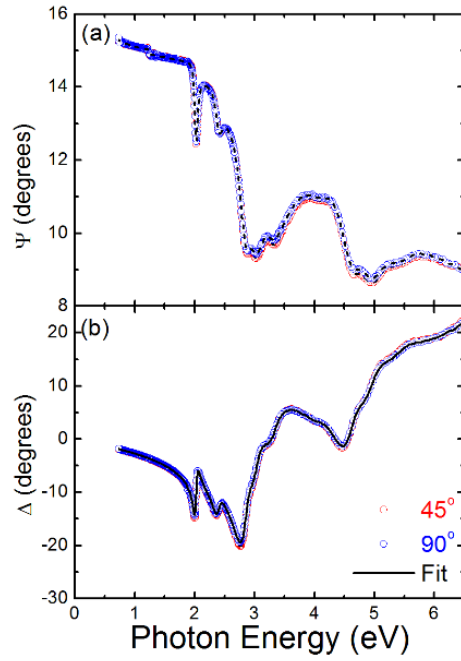

Supplementary Fig. 1 Room temperature experimental at 70° incidence angle and fitting model of ellipsometric parameters of (a) psi ( $\Psi$ ) and (b) delta ( $\Delta$ ) of monolayer WS<sub>2</sub>.

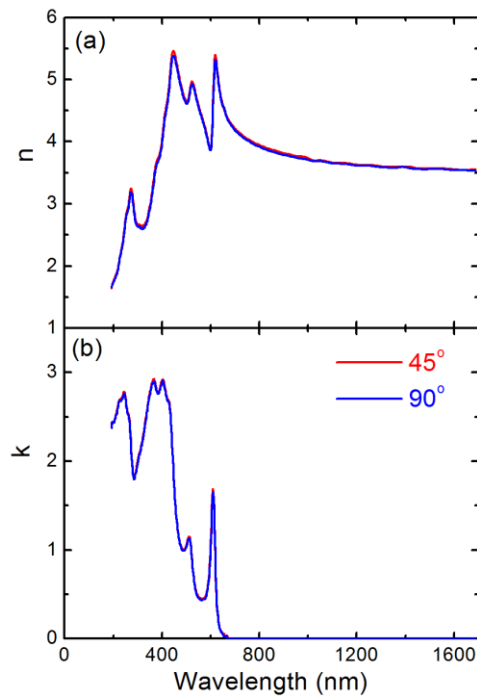

Supplementary Fig. 2 Room temperature (a) refractive index  $n$  and (b) extinction coefficient  $k$  of monolayer WS<sub>2</sub> by rotating the sample's azimuthal orientation by 45 degree and 90 degree.

$$\alpha(\omega) = \text{Im} \left[ \sum_{j=1}^N \frac{\omega_{pj}^2}{(\omega_j^2 - \omega^2) - i\omega\gamma_j} \right]$$

where  $\omega_j$ ,  $\gamma_j$ , and  $\omega_{pj}$  are the frequency, damping, and oscillator strength of the  $j$ th Lorentzian contributions.

Supplementary Table 1 Parameters of a Lorentzian fit for the measured optical absorption data of monolayer MoS<sub>2</sub> at 4.5 K.

|                                   |      |
|-----------------------------------|------|
| $\omega_1$ (eV)                   | 1.96 |
| $\gamma_1$ (eV)                   | 0.02 |
| $\omega_{p1}$ (cm <sup>-1</sup> ) | 770  |
| $\omega_2$ (eV)                   | 2.12 |
| $\gamma_2$ (eV)                   | 0.08 |
| $\omega_{p2}$ (cm <sup>-1</sup> ) | 1300 |
| $\omega_3$ (eV)                   | 2.94 |
| $\gamma_3$ (eV)                   | 0.19 |
| $\omega_{p3}$ (cm <sup>-1</sup> ) | 2800 |
| $\omega_4$ (eV)                   | 3.20 |
| $\gamma_4$ (eV)                   | 0.63 |
| $\omega_{p4}$ (cm <sup>-1</sup> ) | 6400 |
| $\omega_5$ (eV)                   | 3.76 |
| $\gamma_5$ (eV)                   | 0.15 |
| $\omega_{p5}$ (cm <sup>-1</sup> ) | 936  |
| $\omega_6$ (eV)                   | 4.11 |
| $\gamma_6$ (eV)                   | 0.24 |
| $\omega_{p6}$ (cm <sup>-1</sup> ) | 2400 |
| $\omega_7$ (eV)                   | 4.30 |
| $\gamma_7$ (eV)                   | 0.49 |
| $\omega_{p7}$ (cm <sup>-1</sup> ) | 4100 |
| $\omega_8$ (eV)                   | 4.83 |
| $\gamma_8$ (eV)                   | 0.88 |
| $\omega_{p8}$ (cm <sup>-1</sup> ) | 6300 |
| $\omega_9$ (eV)                   | 5.33 |
| $\gamma_9$ (eV)                   | 0.92 |
| $\omega_{p9}$ (cm <sup>-1</sup> ) | 5100 |

|                                    |      |
|------------------------------------|------|
| $\omega_{10}$ (eV)                 | 5.89 |
| $\gamma_{10}$ (eV)                 | 0.98 |
| $\omega_{p10}$ (cm <sup>-1</sup> ) | 6600 |

Supplementary Table 2 Parameters of a Lorentzian fit for the measured optical absorption data of monolayer MoSe<sub>2</sub> at 4.5 K.

|                                   |      |
|-----------------------------------|------|
| $\omega_1$ (eV)                   | 1.62 |
| $\gamma_1$ (eV)                   | 0.03 |
| $\omega_{p1}$ (cm <sup>-1</sup> ) | 500  |
| $\omega_2$ (eV)                   | 1.86 |
| $\gamma_2$ (eV)                   | 0.10 |
| $\omega_{p2}$ (cm <sup>-1</sup> ) | 870  |
| $\omega_3$ (eV)                   | 2.65 |
| $\gamma_3$ (eV)                   | 0.76 |
| $\omega_{p3}$ (cm <sup>-1</sup> ) | 4000 |
| $\omega_4$ (eV)                   | 3.10 |
| $\gamma_4$ (eV)                   | 0.83 |
| $\omega_{p4}$ (cm <sup>-1</sup> ) | 4200 |
| $\omega_5$ (eV)                   | 4.14 |
| $\gamma_5$ (eV)                   | 1.47 |
| $\omega_{p5}$ (cm <sup>-1</sup> ) | 7500 |
| $\omega_6$ (eV)                   | 5.25 |
| $\gamma_6$ (eV)                   | 1.84 |
| $\omega_{p6}$ (cm <sup>-1</sup> ) | 8800 |

Supplementary Table 3 Parameters of a Lorentzian fit for the measured optical absorption data of monolayer WS<sub>2</sub> at 4.5 K.

|                                    |      |
|------------------------------------|------|
| $\omega_1$ (eV)                    | 2.12 |
| $\gamma_1$ (eV)                    | 0.04 |
| $\omega_{p1}$ (cm <sup>-1</sup> )  | 1130 |
| $\omega_2$ (eV)                    | 2.51 |
| $\gamma_2$ (eV)                    | 0.10 |
| $\omega_{p2}$ (cm <sup>-1</sup> )  | 1350 |
| $\omega_3$ (eV)                    | 2.91 |
| $\gamma_3$ (eV)                    | 0.20 |
| $\omega_{p3}$ (cm <sup>-1</sup> )  | 2520 |
| $\omega_4$ (eV)                    | 3.12 |
| $\gamma_4$ (eV)                    | 0.24 |
| $\omega_{p4}$ (cm <sup>-1</sup> )  | 3200 |
| $\omega_5$ (eV)                    | 3.41 |
| $\gamma_5$ (eV)                    | 0.37 |
| $\omega_{p5}$ (cm <sup>-1</sup> )  | 3740 |
| $\omega_6$ (eV)                    | 3.64 |
| $\gamma_6$ (eV)                    | 0.36 |
| $\omega_{p6}$ (cm <sup>-1</sup> )  | 3125 |
| $\omega_7$ (eV)                    | 3.88 |
| $\gamma_7$ (eV)                    | 0.40 |
| $\omega_{p7}$ (cm <sup>-1</sup> )  | 2820 |
| $\omega_8$ (eV)                    | 4.17 |
| $\gamma_8$ (eV)                    | 0.45 |
| $\omega_{p8}$ (cm <sup>-1</sup> )  | 3250 |
| $\omega_9$ (eV)                    | 4.69 |
| $\gamma_9$ (eV)                    | 0.37 |
| $\omega_{p9}$ (cm <sup>-1</sup> )  | 3360 |
| $\omega_{10}$ (eV)                 | 5.05 |
| $\gamma_{10}$ (eV)                 | 0.56 |
| $\omega_{p10}$ (cm <sup>-1</sup> ) | 4920 |
| $\omega_{11}$ (eV)                 | 5.59 |
| $\gamma_{11}$ (eV)                 | 1.04 |
| $\omega_{p11}$ (cm <sup>-1</sup> ) | 7825 |

Supplementary Table 4 Parameters of a Lorentzian fit for the measured optical absorption data of monolayer WSe<sub>2</sub> at 4.5 K.

|                                    |      |
|------------------------------------|------|
| $\omega_1$ (eV)                    | 1.71 |
| $\gamma_1$ (eV)                    | 0.05 |
| $\omega_{p1}$ (cm <sup>-1</sup> )  | 966  |
| $\omega_2$ (eV)                    | 2.16 |
| $\gamma_2$ (eV)                    | 0.13 |
| $\omega_{p2}$ (cm <sup>-1</sup> )  | 2450 |
| $\omega_3$ (eV)                    | 2.56 |
| $\gamma_3$ (eV)                    | 0.26 |
| $\omega_{p3}$ (cm <sup>-1</sup> )  | 102  |
| $\omega_4$ (eV)                    | 2.96 |
| $\gamma_4$ (eV)                    | 0.28 |
| $\omega_{p4}$ (cm <sup>-1</sup> )  | 3300 |
| $\omega_5$ (eV)                    | 3.12 |
| $\gamma_5$ (eV)                    | 0.36 |
| $\omega_{p5}$ (cm <sup>-1</sup> )  | 2600 |
| $\omega_6$ (eV)                    | 3.51 |
| $\gamma_6$ (eV)                    | 0.69 |
| $\omega_{p6}$ (cm <sup>-1</sup> )  | 5230 |
| $\omega_7$ (eV)                    | 4.19 |
| $\gamma_7$ (eV)                    | 0.63 |
| $\omega_{p7}$ (cm <sup>-1</sup> )  | 4675 |
| $\omega_8$ (eV)                    | 4.43 |
| $\gamma_8$ (eV)                    | 0.44 |
| $\omega_{p8}$ (cm <sup>-1</sup> )  | 2650 |
| $\omega_9$ (eV)                    | 4.70 |
| $\gamma_9$ (eV)                    | 0.47 |
| $\omega_{p9}$ (cm <sup>-1</sup> )  | 3600 |
| $\omega_{10}$ (eV)                 | 5.00 |
| $\gamma_{10}$ (eV)                 | 0.59 |
| $\omega_{p10}$ (cm <sup>-1</sup> ) | 4260 |
| $\omega_{11}$ (eV)                 | 5.36 |
| $\gamma_{11}$ (eV)                 | 0.78 |
| $\omega_{p11}$ (cm <sup>-1</sup> ) | 5440 |

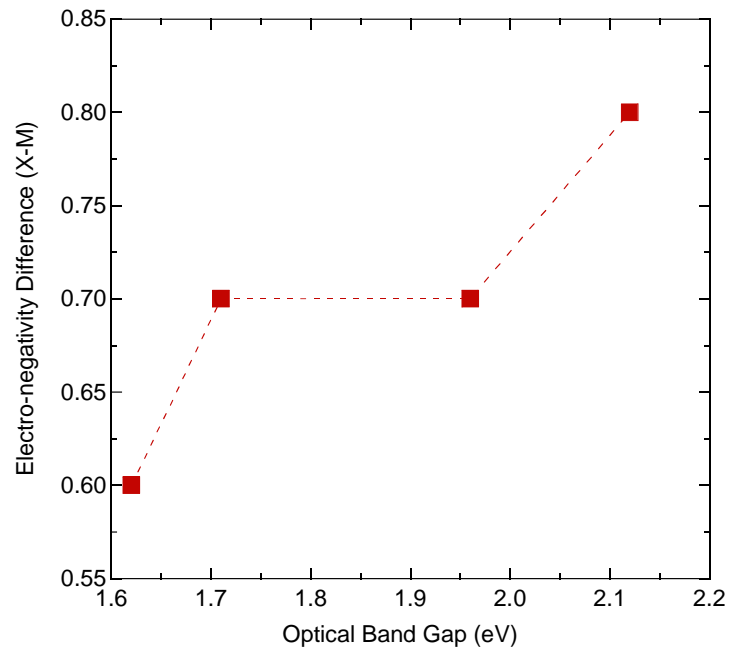

Supplementary Fig. 3 Electro-negativity difference vs. optical band gap of monolayer MoS<sub>2</sub>, MoSe<sub>2</sub>, WS<sub>2</sub>, and WSe<sub>2</sub>.

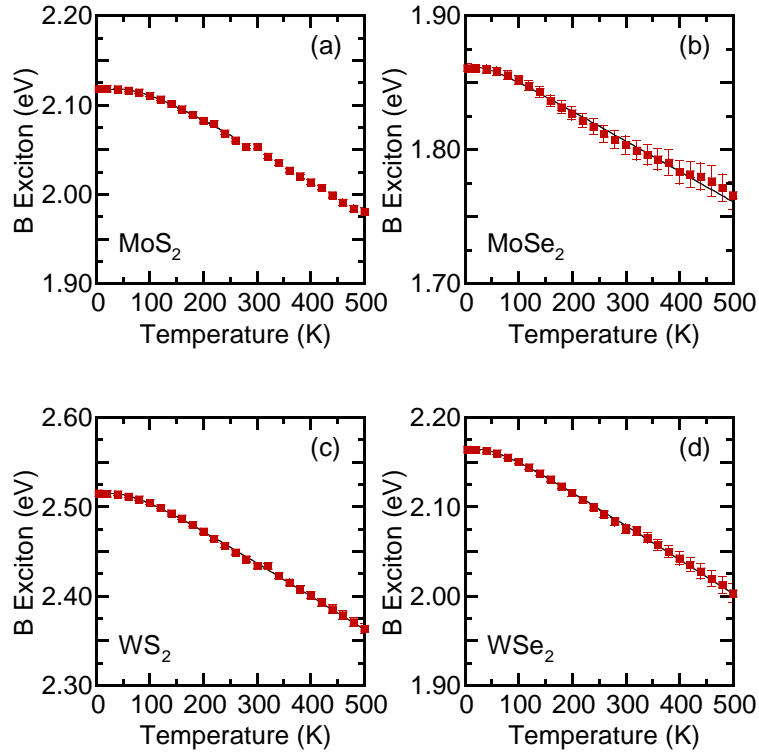

Supplementary Fig. 4 Temperature dependence of peak position of B exciton of monolayer (a)  $\text{MoS}_2$ , (b)  $\text{MoSe}_2$ , (c)  $\text{WS}_2$ , and (d)  $\text{WSe}_2$ . The thin solid lines are the results of the fitting using the Bose-Einstein model.



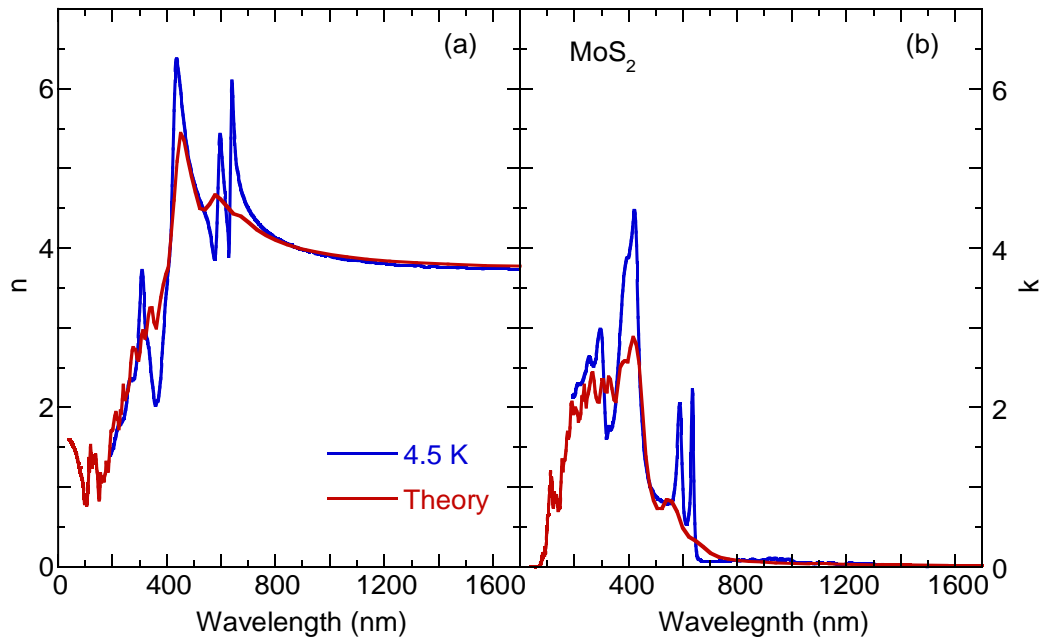

Supplementary Fig. 5 Experimental refractive index  $n$  and extinction coefficient  $k$  of monolayer MoS<sub>2</sub> at 4.5 K and theoretical calculation curves. For better comparison, the theoretical  $n$  spectrum is multiplied by a factor of 1.68.

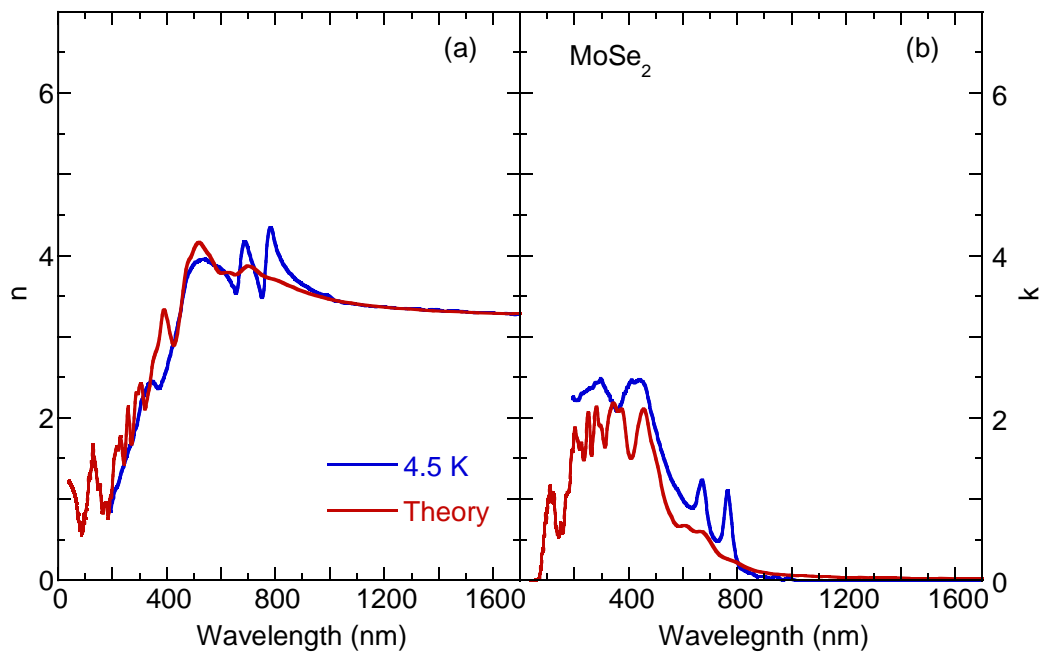

Supplementary Fig. 6 Experimental refractive index  $n$  and extinction coefficient  $k$  of monolayer MoSe<sub>2</sub> at 4.5 K and theoretical calculation curves. For better comparison, the theoretical  $n$  spectrum is multiplied by a factor of 1.30.

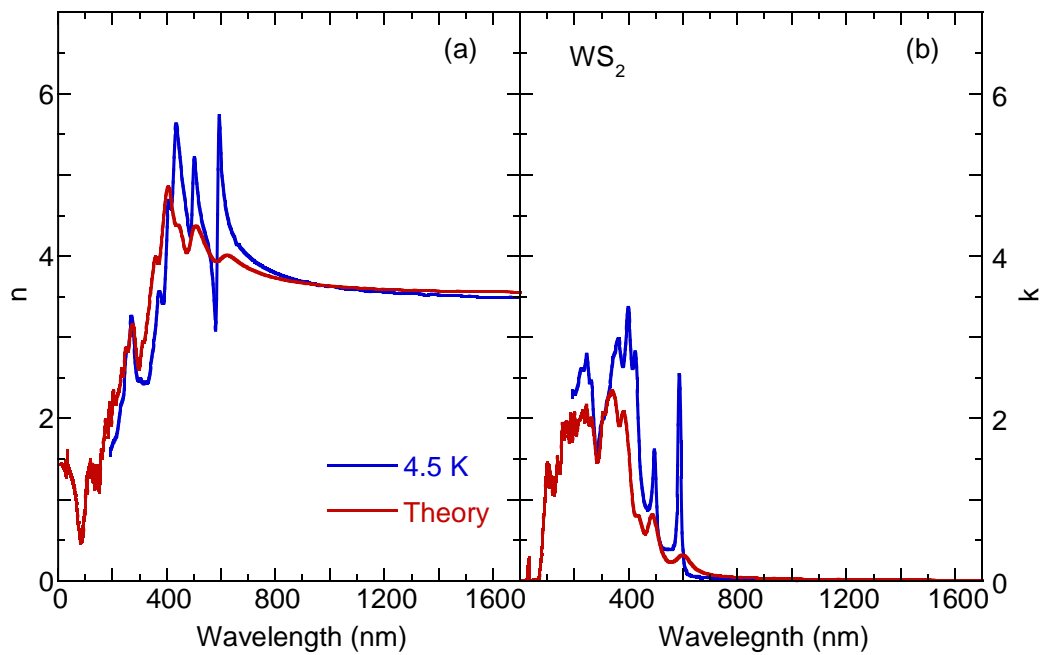

Supplementary Fig. 7 Experimental refractive index  $n$  and extinction coefficient  $k$  of monolayer  $\text{WS}_2$  at 4.5 K and theoretical calculation curves. For better comparison, the theoretical  $n$  spectrum is multiplied by a factor of 1.45.

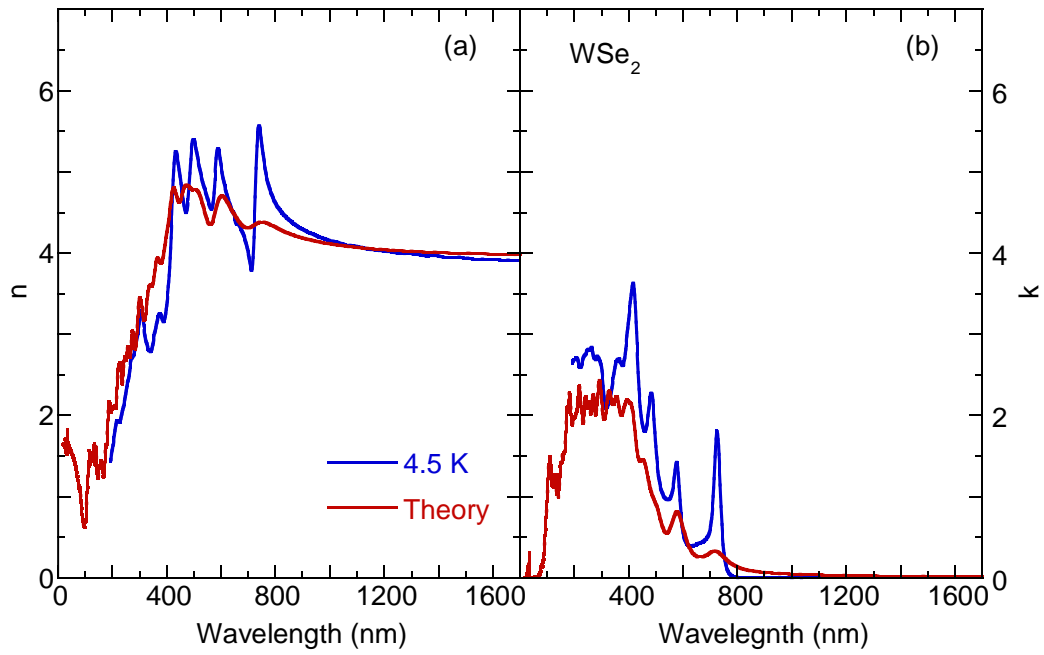

Supplementary Fig. 8 Experimental refractive index  $n$  and extinction coefficient  $k$  of monolayer  $\text{WSe}_2$  at 4.5 K and theoretical calculation curves. For better comparison, the theoretical  $n$  spectrum is multiplied by a factor of 1.68.

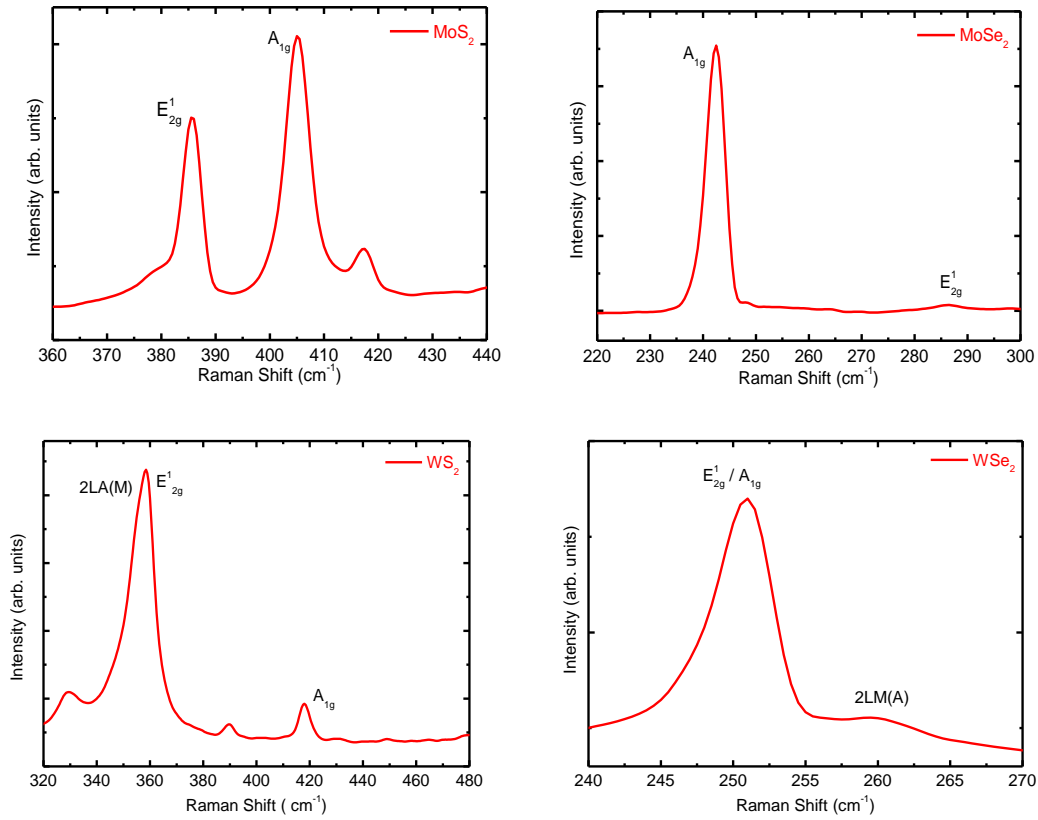

Supplementary Fig. 9 Room temperature Raman scattering spectra of monolayer MoS<sub>2</sub>, MoSe<sub>2</sub>, WS<sub>2</sub>, and WSe<sub>2</sub> excited by a 532 nm laser line. These spectra indicated a single-layer signature [52,53].

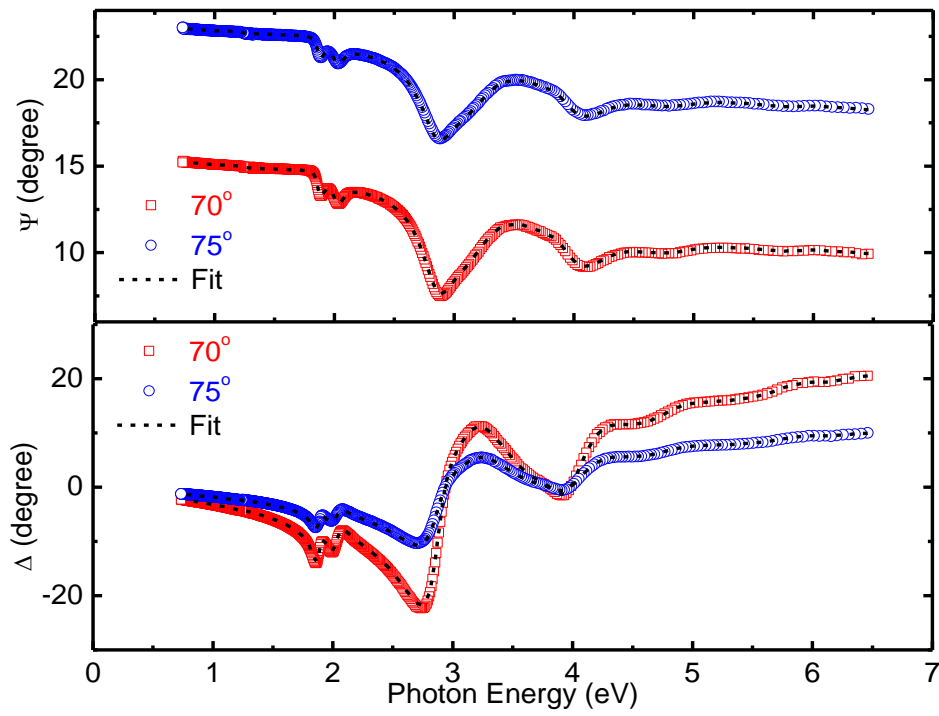

Supplementary Fig. 10 Room temperature experimental at  $70^\circ$  and  $75^\circ$  incidence angles and fitting model of ellipsometric parameters of psi ( $\Psi$ ) and delta ( $\Delta$ ) of monolayer  $\text{MoS}_2$ .

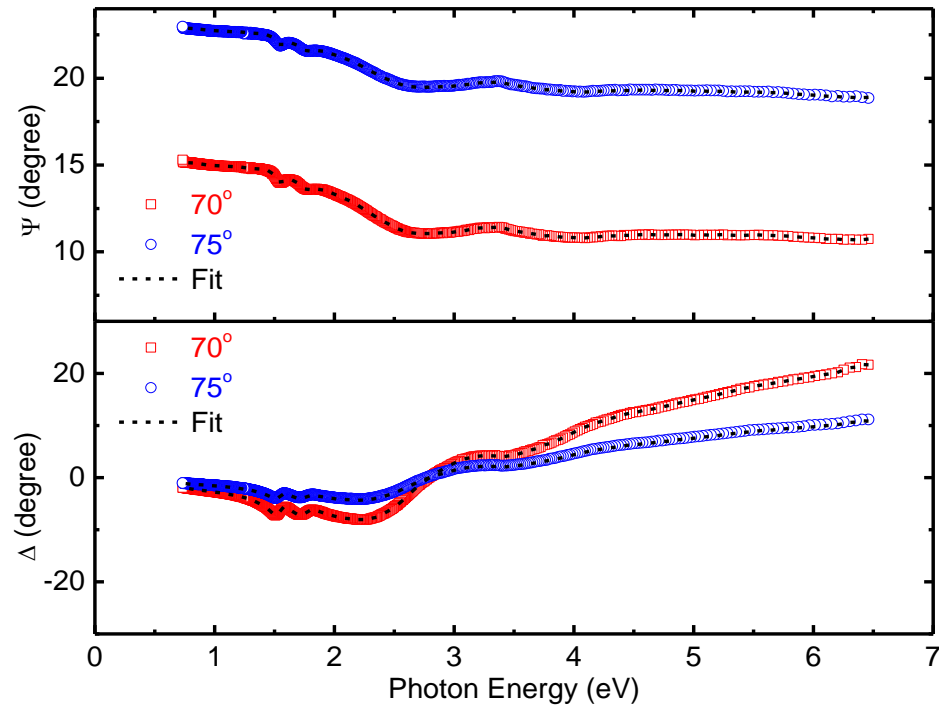

Supplementary Fig. 11 Room temperature experimental at  $70^\circ$  and  $75^\circ$  incidence angles and fitting model of ellipsometric parameters of psi ( $\Psi$ ) and delta ( $\Delta$ ) of monolayer  $\text{MoSe}_2$ .

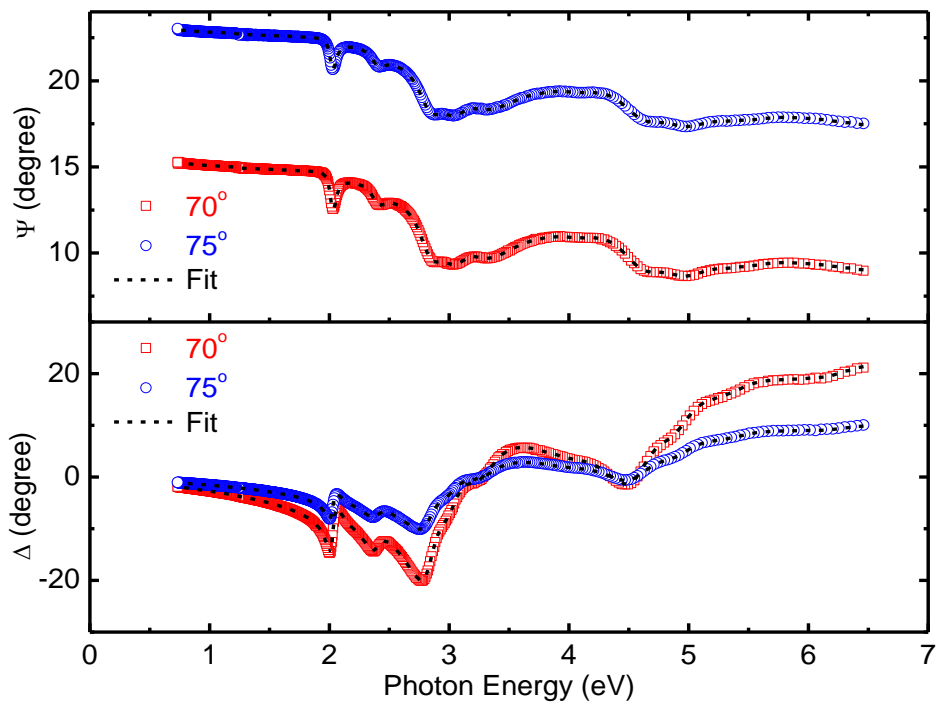

Supplementary Fig. 12 Room temperature experimental at  $70^\circ$  and  $75^\circ$  incidence angles and fitting model of ellipsometric parameters of psi ( $\Psi$ ) and delta ( $\Delta$ ) of monolayer  $\text{WS}_2$ .

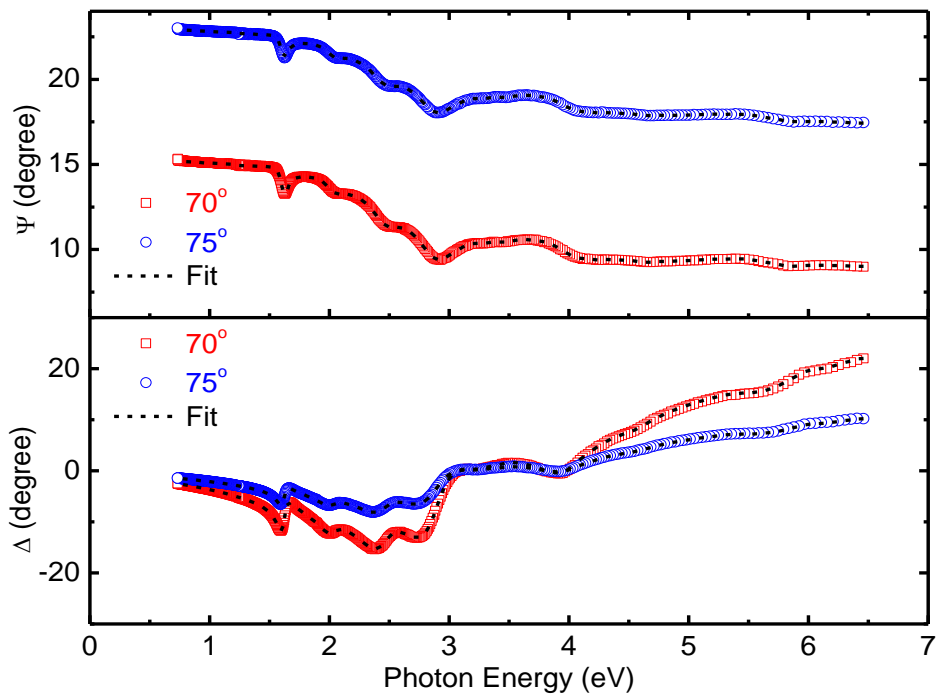

Supplementary Fig. 13 Room temperature experimental at  $70^\circ$  and  $75^\circ$  incidence angles and fitting model of ellipsometric parameters of psi ( $\Psi$ ) and delta ( $\Delta$ ) of monolayer  $\text{WSe}_2$ .

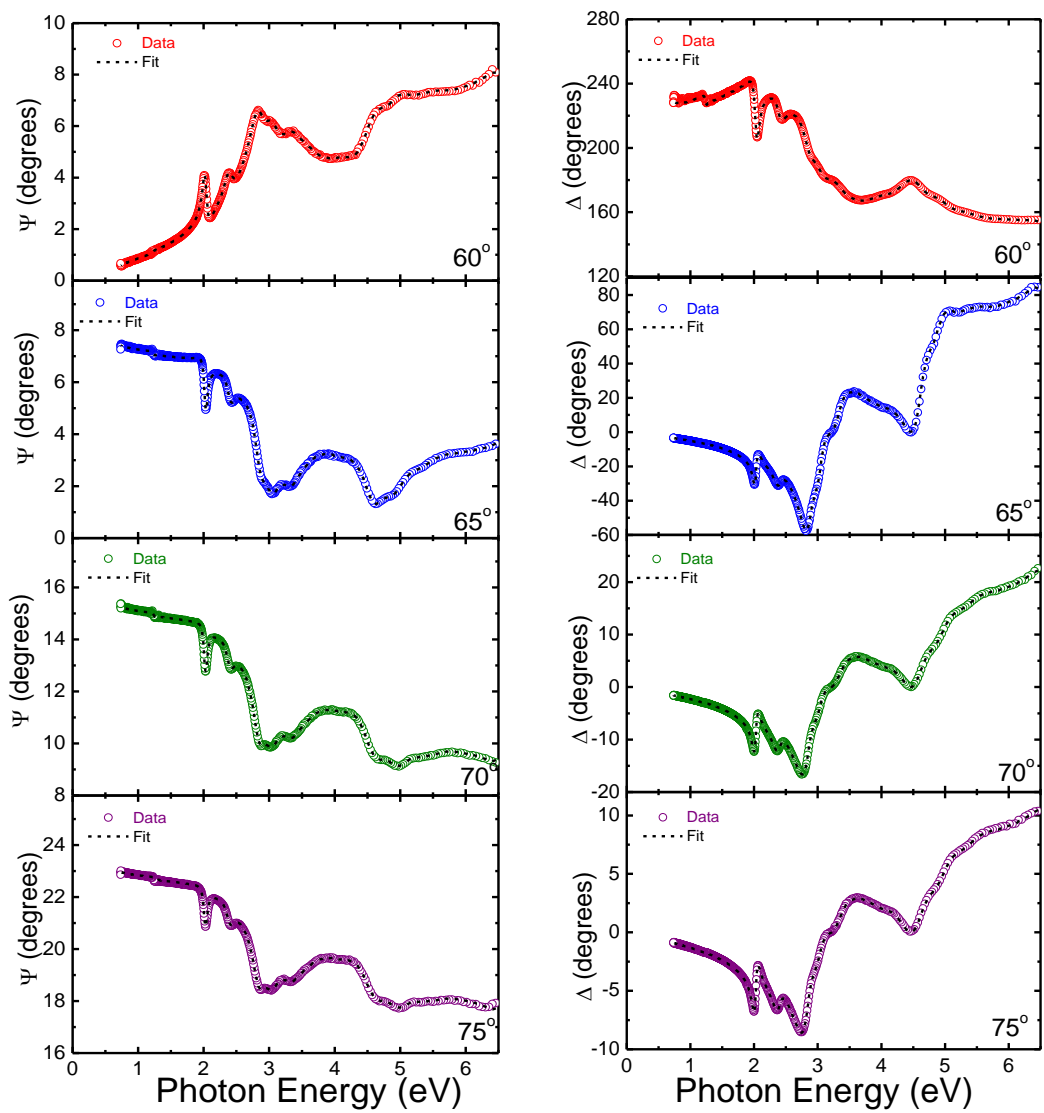

Supplementary Fig. 14 Room temperature experimental at  $60^\circ$ ,  $65^\circ$ ,  $70^\circ$ , and  $75^\circ$  incidence angles and fitting model of ellipsometric parameters of  $\Psi$  and  $\Delta$  of monolayer  $\text{WS}_2$ .
